# Supplementary material for: Crystal growth and thermal properties of a LiY(MoO4)2 crystal
Source: Royal Society of Chemistry journal article supplement (doi:10.1039/d2ce01498j), 2022-12-20
Supplement: d2ce01498j1.pdf [file d2ce01498j1.pdf]

**Table S1.** Crystal Data and Structure Refinement for LiY(MoO<sub>4</sub>)<sub>2</sub>

| Empirical formula                 | LiY(MoO <sub>4</sub> ) <sub>2</sub>                                         |
|-----------------------------------|-----------------------------------------------------------------------------|
| Formula weight                    | 425.98                                                                      |
| Temperature                       | 293 K                                                                       |
| Wavelength                        | 0.71073                                                                     |
| Crystal system                    | Tetragonal                                                                  |
| Space group                       | <i>I</i> 4 <sub>1</sub> / <i>a</i> (No. 88)                                 |
| Unit cell dimensions              | <i>a</i> = 5.1493 (3) Å<br><i>c</i> = 11.2092 (8) Å                         |
| Volume                            | 297.22 (4) Å <sup>3</sup>                                                   |
| <i>Z</i>                          | 2                                                                           |
| Density (calculated)              | 4.759 g/cm <sup>3</sup>                                                     |
| Absorption coefficient            | 15.039                                                                      |
| F(000)                            | 389.0                                                                       |
| Crystal size                      | 0.12 × 0.08 × 0.07 mm <sup>3</sup>                                          |
| θ range for data collection       | 4.4 to 26.8°<br>−6 ≤ <i>h</i> ≤ 6                                           |
| Index ranges                      | −6 ≤ <i>k</i> ≤ 6<br>−14 ≤ <i>l</i> ≤ 14                                    |
| Reflections collected             | 4787                                                                        |
| Independent reflections           | 165 [ <i>R</i> <sub>int</sub> = 0.0670, <i>R</i> <sub>sigma</sub> = 0.0342] |
| <i>R</i> <sub>int</sub>           | 0.067                                                                       |
| Data / restraints / parameters    | 165/0/16                                                                    |
| Goodness-of-fit on F <sup>2</sup> | 1.114                                                                       |

Final R indices [ $>2 \sigma(I)$ ] $R_1 = 0.0660$ ,  $wR_2 = 0.1273$ 

R indices [all data]

 $R_1 = 0.0663$ ,  $wR_2 = 0.1299$ 

Largest diff. peak and hole

2.26 and  $-1.51 \text{ e } \text{\AA}^{-3}$ 

$R = \Sigma ||F_o| - |F_c|| / \Sigma |F_o|$ ,  $wR = \{ \Sigma [w(|F_o|^2 - |F_c|^2)^2] / \Sigma [w(|F_o|^4)] \}^{1/2}$  and calc  $w = 1 / [ \sigma^2 (F_o^2) + (0.0503P)^2 + 0.0000P ]$  where  $P = (F_o^2 + 2F_c^2) / 3$

**Table S2.** Selected bond lengths ( $\text{\AA}$ ) and angles (deg.) in  $\text{LiY}(\text{MoO}_4)_2$ 

|                                      |             |                                       |            |
|--------------------------------------|-------------|---------------------------------------|------------|
| Mo1—O1 <sup>1</sup>                  | 1.773(2)    | Y1—O1 <sup>9</sup>                    | 2.402 (2)  |
| Mo1—O1 <sup>2</sup>                  | 1.773(2)    | Y1—O1 <sup>10</sup>                   | 2.402 (2)  |
| Mo1—O1 <sup>3</sup>                  | 1.773(2)    | Y1—O1                                 | 2.402 (2)  |
| Mo1—O1                               | 1.773(2)    | Y1—O1 <sup>11</sup>                   | 2.402 (2)  |
| Y1—Y1 <sup>4</sup>                   | 3.80548(19) | Y1—O1 <sup>12</sup>                   | 2.402 (2)  |
| Y1—Y1 <sup>5</sup>                   | 3.80548(19) | Y1—O1 <sup>13</sup>                   | 2.402 (2)  |
| Y1—Y1 <sup>6</sup>                   | 3.80548(17) | Y1—O1 <sup>5</sup>                    | 2.402 (2)  |
| Y1—Y1 <sup>7</sup>                   | 3.80548(17) | O1—Li1 <sup>9</sup>                   | 2.402 (2)  |
| Y1—O1 <sup>8</sup>                   | 2.402(2)    |                                       |            |
| O1 <sup>1</sup> —Mo1—O1 <sup>2</sup> | 106.78(7)   | O1 <sup>12</sup> —Y1—O1 <sup>8</sup>  | 69.11(5)   |
| O1 <sup>2</sup> —Mo1—O1 <sup>3</sup> | 106.78(7)   | O1—Y1—O1 <sup>10</sup>                | 79.31(11)  |
| O1 <sup>1</sup> —Mo1—O1 <sup>3</sup> | 115.01(15)  | O1 <sup>5</sup> —Y1—O1 <sup>8</sup>   | 99.03(4)   |
| O1—Mo1—O1 <sup>2</sup>               | 115.00(15)  | O1 <sup>13</sup> —Y1—O1 <sup>5</sup>  | 73.82(4)   |
| O1—Mo1—O1 <sup>1</sup>               | 106.78(7)   | O1 <sup>12</sup> —Y1—O1 <sup>11</sup> | 75.32(8)   |
| O1—Mo1—O1 <sup>3</sup>               | 106.78(7)   | O1 <sup>10</sup> —Y1—O1 <sup>11</sup> | 152.71(10) |
| Y1 <sup>4</sup> —Y1—Y1 <sup>5</sup>  | 122.838(4)  | O1 <sup>5</sup> —Y1—O1 <sup>11</sup>  | 99.03(4)   |
| Y1 <sup>6</sup> —Y1—Y1 <sup>4</sup>  | 122.838(4)  | O1 <sup>8</sup> —Y1—O1 <sup>11</sup>  | 133.32(11) |
| Y1 <sup>7</sup> —Y1—Y1 <sup>4</sup>  | 85.151(5)   | O1—Y1—O1 <sup>13</sup>                | 126.36(7)  |
| Y1 <sup>6</sup> —Y1—Y1 <sup>5</sup>  | 85.151(5)   | O1 <sup>12</sup> —Y1—O1 <sup>5</sup>  | 152.71(10) |

|                                      |            |                                        |            |
|--------------------------------------|------------|----------------------------------------|------------|
| Y1 <sup>7</sup> —Y1—Y1 <sup>5</sup>  | 122.838(3) | O1 <sup>13</sup> —Y1—O1 <sup>10</sup>  | 126.36(7)  |
| Y1 <sup>7</sup> —Y1—Y1 <sup>6</sup>  | 122.838(4) | O1—Y1—O1 <sup>12</sup>                 | 126.35(7)  |
| O1 <sup>8</sup> —Y1—Y1 <sup>5</sup>  | 131.32(6)  | O1 <sup>13</sup> —Y1—O1 <sup>12</sup>  | 79.31(11)  |
| O1 <sup>9</sup> —Y1—Y1 <sup>4</sup>  | 85.60(5)   | O1 <sup>9</sup> —Y1—O1 <sup>5</sup>    | 133.32(11) |
| O1 <sup>10</sup> —Y1—Y1 <sup>4</sup> | 159.35(5)  | O1—Y1—O1 <sup>9</sup>                  | 69.11(5)   |
| O1 <sup>8</sup> —Y1—Y1 <sup>7</sup>  | 37.64(5)   | O1 <sup>13</sup> —Y1—O1 <sup>9</sup>   | 152.71(10) |
| O1 <sup>10</sup> —Y1—Y1 <sup>5</sup> | 69.97(6)   | O1 <sup>13</sup> —Y1—O1 <sup>11</sup>  | 69.11(5)   |
| O1 <sup>11</sup> —Y1—Y1 <sup>4</sup> | 37.64(5)   | O1—Y1—O1 <sup>8</sup>                  | 152.71(10) |
| O1 <sup>12</sup> —Y1—Y1 <sup>4</sup> | 37.68(5)   | O1 <sup>10</sup> —Y1—O1 <sup>9</sup>   | 75.32(8)   |
| O1 <sup>10</sup> —Y1—Y1 <sup>7</sup> | 101.43(5)  | O1 <sup>10</sup> —Y1—O1 <sup>5</sup>   | 69.11(5)   |
| O1 <sup>12</sup> —Y1—Y1 <sup>7</sup> | 69.97(6)   | Mo1—O1—Y1 <sup>5</sup>                 | 120.54(11) |
| O1 <sup>13</sup> —Y1—Y1 <sup>5</sup> | 101.43(5)  | Mo1—O1—Y1                              | 130.80(12) |
| O1 <sup>9</sup> —Y1—Y1 <sup>6</sup>  | 37.64(5)   | Mo1—O1—Li1                             | 130.80(12) |
| O1 <sup>12</sup> —Y1—Y1 <sup>5</sup> | 159.35(5)  | Y1—O1—Y1 <sup>5</sup>                  | 104.68(8)  |
| O1 <sup>5</sup> —Y1—Y1 <sup>6</sup>  | 102.03(6)  | O1 <sup>12</sup> —Li1—O1 <sup>5</sup>  | 152.71(10) |
| O1 <sup>11</sup> —Y1—Y1 <sup>7</sup> | 102.03(6)  | O1—Li1—O1 <sup>11</sup>                | 73.82(4)   |
| O1 <sup>8</sup> —Y1—Y1 <sup>6</sup>  | 85.60(5)   | O1 <sup>9</sup> —Li1—O1 <sup>11</sup>  | 99.03(4)   |
| O1 <sup>8</sup> —Y1—Y1 <sup>4</sup>  | 102.03(6)  | O1 <sup>10</sup> —Li1—O1 <sup>8</sup>  | 73.82(4)   |
| O1 <sup>11</sup> —Y1—Y1 <sup>6</sup> | 131.31(6)  | O1—Li1—O1 <sup>8</sup>                 | 152.71(10) |
| O1 <sup>9</sup> —Y1—Y1 <sup>5</sup>  | 102.03(6)  | O1 <sup>5</sup> —Li1—O1 <sup>11</sup>  | 99.03(4)   |
| O1—Y1—Y1 <sup>7</sup>                | 159.35(5)  | O1 <sup>9</sup> —Li1—O1 <sup>8</sup>   | 99.03(4)   |
| O1—Y1—Y1 <sup>6</sup>                | 69.97(6)   | O1 <sup>13</sup> —Li1—O1 <sup>8</sup>  | 75.32(8)   |
| O1—Y1—Y1 <sup>4</sup>                | 101.43(5)  | O1 <sup>10</sup> —Li1—O1 <sup>11</sup> | 152.71(10) |
| O1—Y1—Y1 <sup>5</sup>                | 37.68(5)   | O1 <sup>12</sup> —Li1—O1 <sup>11</sup> | 75.32(8)   |
| O1 <sup>5</sup> —Y1—Y1 <sup>5</sup>  | 37.64(5)   | O1 <sup>8</sup> —Li1—O1 <sup>11</sup>  | 133.32(11) |

|                                       |           |                                        |            |
|---------------------------------------|-----------|----------------------------------------|------------|
| O1 <sup>13</sup> —Y1—Y1 <sup>6</sup>  | 159.35(5) | O1—Li1—O1 <sup>10</sup>                | 79.31(11)  |
| O1 <sup>11</sup> —Y1—Y1 <sup>5</sup>  | 85.60(5)  | O1—Li1—O1 <sup>9</sup>                 | 69.11(5)   |
| O1 <sup>9</sup> —Y1—Y1 <sup>7</sup>   | 131.31(6) | O1 <sup>5</sup> —Li1—O1 <sup>8</sup>   | 99.03(4)   |
| O1 <sup>5</sup> —Y1—Y1 <sup>7</sup>   | 85.60(5)  | O1 <sup>13</sup> —Li1—O1 <sup>9</sup>  | 152.71(10) |
| O1 <sup>10</sup> —Y1—Y1 <sup>6</sup>  | 37.68(5)  | O1 <sup>13</sup> —Li1—O1 <sup>10</sup> | 126.36(7)  |
| O1 <sup>5</sup> —Y1—Y1 <sup>4</sup>   | 131.31(6) | O1 <sup>10</sup> —Li1—O1 <sup>9</sup>  | 75.32(8)   |
| O1 <sup>13</sup> —Y1—Y1 <sup>7</sup>  | 37.68(5)  | O1 <sup>9</sup> —Li1—O1 <sup>5</sup>   | 133.32(11) |
| O1 <sup>12</sup> —Y1—Y1 <sup>6</sup>  | 101.43(5) | O1 <sup>12</sup> —Li1—O1 <sup>9</sup>  | 73.82(4)   |
| O1 <sup>13</sup> —Y1—Y1 <sup>4</sup>  | 69.97(6)  | O1—Li1—O1 <sup>12</sup>                | 126.35(7)  |
| O1 <sup>12</sup> —Y1—O1 <sup>9</sup>  | 73.82(4)  | O1—Li1—O1 <sup>5</sup>                 | 75.32(8)   |
| O1 <sup>10</sup> —Y1—O1 <sup>8</sup>  | 73.82(4)  | O1 <sup>12</sup> —Li1—O1 <sup>8</sup>  | 69.11(5)   |
| O1—Y1—O1 <sup>11</sup>                | 73.82(4)  | O1 <sup>13</sup> —Li1—O1 <sup>5</sup>  | 73.82(4)   |
| O1 <sup>9</sup> —Y1—O1 <sup>11</sup>  | 99.03(4)  | O1 <sup>13</sup> —Li1—O1 <sup>12</sup> | 79.31(11)  |
| O1 <sup>9</sup> —Y1—O1 <sup>8</sup>   | 99.03(4)  | O1 <sup>10</sup> —Li1—O1 <sup>5</sup>  | 69.11(5)   |
| O1 <sup>10</sup> —Y1—O1 <sup>12</sup> | 126.36(7) | O1 <sup>13</sup> —Li1—O1 <sup>11</sup> | 69.11(5)   |
| O1 <sup>13</sup> —Y1—O1 <sup>8</sup>  | 75.32(8)  | O1—Li1—O1 <sup>13</sup>                | 126.36(7)  |
| O1—Y1—O1 <sup>5</sup>                 | 75.32(8)  | O1 <sup>10</sup> —Li1—O1 <sup>12</sup> | 126.36(7)  |

---

(1)  $1/4+Y, 3/4-X, 3/4-Z$ ; (2)  $1-X, 1/2-Y, +Z$ ; (3)  $3/4-Y, -1/4+X, 3/4-Z$ ; (4)  $3/2-X, 1/2-Y, 3/2-Z$ ; (5)  $2-X, 1-Y, 1-Z$ ; (6)  $2-X, -Y, 1-Z$ ; (7)  $5/2-X, 1/2-Y, 3/2-Z$ ; (8)  $7/4-Y, -3/4+X, 1/4+Z$ ; (9)  $+X, -1/2+Y, 1-Z$ ; (10)  $2-X, 1/2-Y, +Z$ ; (11)  $1/4+Y, 5/4-X, 1/4+Z$ ; (12)  $5/4-Y, -3/4+X, 5/4-Z$ ; (13)  $3/4+Y, 5/4-X, 5/4-Z$

**Table S3.** Atomic displacement parameters ( $\text{\AA}^2$ ) for  $\text{LiY}(\text{MoO}_4)_2$ 

| Atom | $U^{11}$ | $U^{22}$ | $U^{33}$ | $U^{23}$ | $U^{13}$ | $U^{12}$ |
|------|----------|----------|----------|----------|----------|----------|
| Mo1  | 31.8(10) | 31.8(10) | 34.5(14) | 0        | 0        | 0        |
| Y1   | 37.4(18) | 37.4(18) | 38(3)    | 0        | 0        | 0        |
| O1   | 41.4(17) | 35.6(14) | 39.9(18) | 0.8(10)  | -4.2(7)  | -1.4(8)  |
| Li1  | 37.4(18) | 37.4(18) | 38(3)    | 0        | 0        | 0        |
